# Supplementary material for: Diverse pore ordering in porous silica: synthesis and quantitative structural insights based on combining scattering and imaging techniques
Source: Royal Society of Chemistry journal article supplement (doi:10.1039/d4cp04056b), 2025-01-01
Supplement: d4cp04056b1.pdf [file d4cp04056b1.pdf]

*Supporting document:*

**Diverse Pore Ordering in porous Silica: Synthesis and a Quantitative  
Structural Insights Combining Scattering and Imaging Techniques**

*Avik Das<sup>1</sup>, Satish K. Mandal<sup>1</sup>, Nitesh Kumar<sup>2</sup>, Nayan Maity<sup>2</sup>, Ashwani Kumar<sup>1</sup>, Swarnsikha  
Sinha<sup>3</sup>, Jitendra Bahadur<sup>1,4</sup>, Biswajit Chowdhury<sup>2\*</sup>, Debasis Sen<sup>1,4\*</sup>*

<sup>1</sup>Solid State Physics Division, Bhabha Atomic Research Centre, Mumbai 400 085, India

<sup>2</sup>Department of Chemistry and Chemical Biology, Indian Institute of Technology (Indian  
School of Mines), Dhanbad, 826004, India

<sup>3</sup>Central University of Jharkhand, Ranchi, 835 222, India

<sup>4</sup>Homi Bhabha National Institute, Anushaktinagar, Mumbai 400 094, India

\*Corresponding Author's Email: [debasis@barc.gov.in](mailto:debasis@barc.gov.in), [biswajit72@iitism.ac.in](mailto:biswajit72@iitism.ac.in)

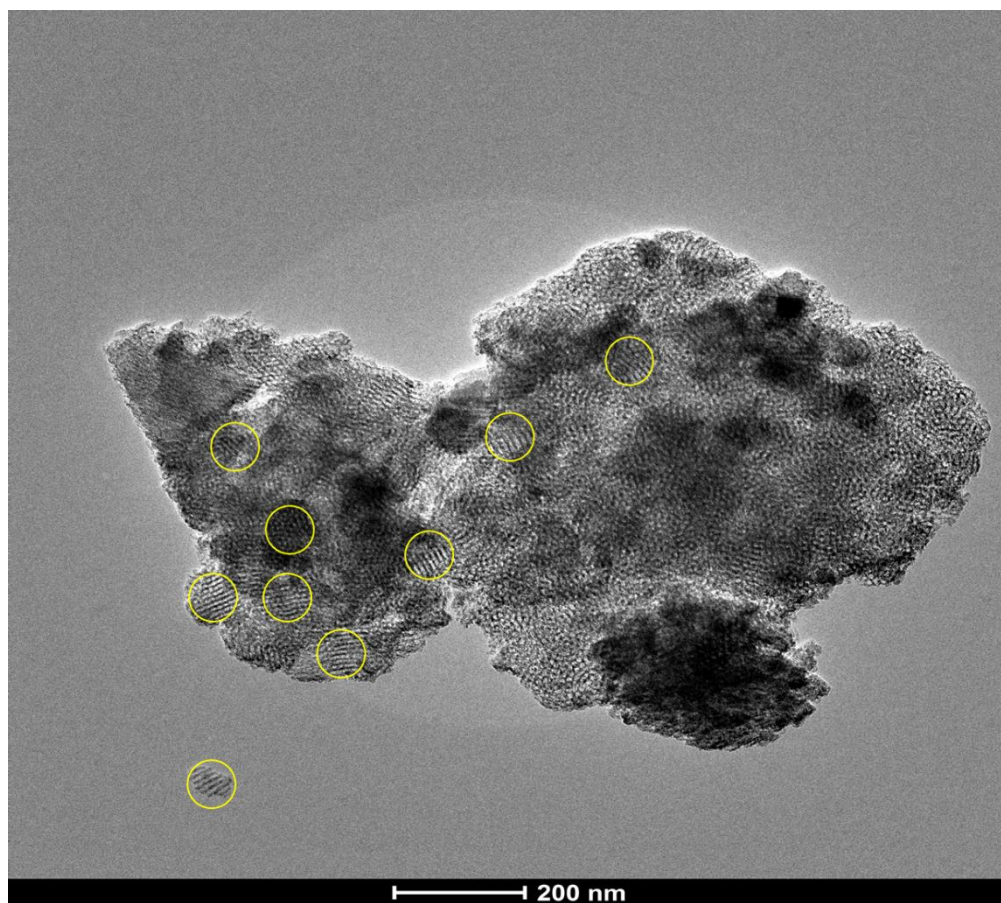

**Fig. S1:** HRTEM micrograph of PS-2 sample showing pore channels perpendicular to the [001] axis.

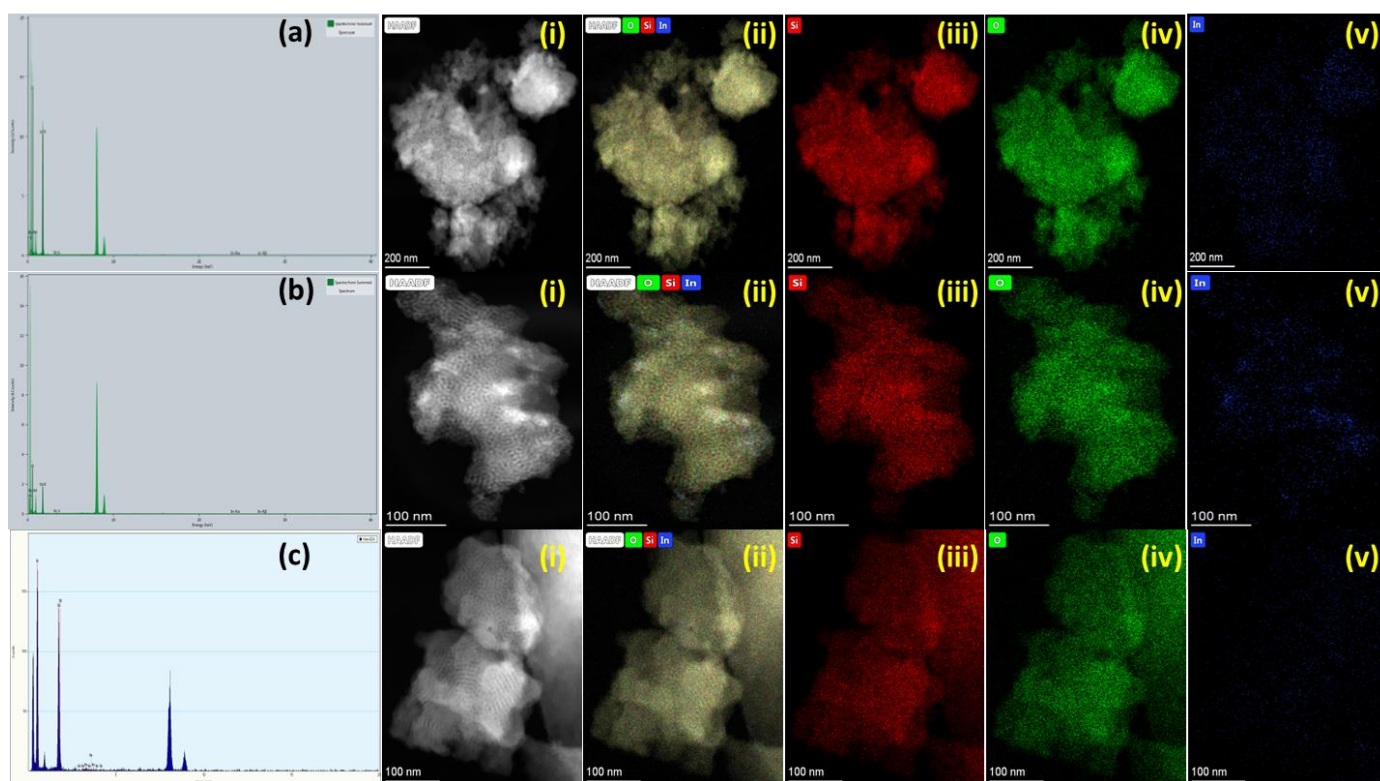

**Fig. S2:** Elemental mapping of synthesized mesoporous silica: (a) PS-1, (b) PS-2, and (c) PS-3. Fig. (a-c) [i, ii] represents HADDF pattern of the mapped area and Fig. (a-c) [iii, iv, and v] represent elemental mapping of Si, O and In, respectively.
